# Supplementary material for: Layered-perovskite oxides with in situ exsolved Co–Fe alloy nanoparticles as highly efficient electrodes for high-temperature carbon dioxide electrolysis
Source: Royal Society of Chemistry journal article supplement (doi:10.1039/d1ta07251j), 2021-11-29
Supplement: d1ta07251j1.pdf [file d1ta07251j1.pdf]

## Supporting Information

### Layered-perovskite oxides with *in-situ* exsolved Co-Fe alloy nanoparticles as highly efficient electrode for high-temperature carbon dioxide electrolysis

Xiang Sun<sup>a</sup>, Yongjian Ye<sup>a</sup>, Mengzhen Zhou<sup>a</sup>, Huijun Chen<sup>a</sup>, Ying Li<sup>a</sup>, Peirong Chen<sup>a</sup>, Dehua Dong<sup>b</sup>, Yihan Ling<sup>c</sup>, Majid Khan<sup>d</sup>, Yan Chen<sup>\*a</sup>

#### Material Synthesis :

The solid-state reaction method was used to synthesis the double perovskite  $\text{Sr}_2\text{Ti}_{0.8}\text{Co}_{0.2}\text{FeO}_{6-\delta}$  (STCF) as described elsewhere.<sup>[1,2]</sup> The stoichiometric of STCF sample was prepared by mixed the stoichiometric ratio powders of  $\text{SrCO}_3$ ,  $\text{TiO}_2$ ,  $\text{Co}_3\text{O}_4$ ,  $\text{Fe}_2\text{O}_3$  (Macklin, China) and appropriate amount of ethanol as solvent together in ball mill to grind for 24 h. Then, placing the dried powder sample in a high temperature muffle furnace and the mixture were calcined at 1200 °C for 8 h in air with a heating rate of 2 °C min<sup>-1</sup>.

The same preparation method for STCF fuel electrode was used to synthesize the  $\text{La}_{0.7}\text{Sr}_{0.3}\text{CoO}_{3-\delta}$  (LSC) oxygen electrode. The precursor, which was mixed the stoichiometric ratio powders of  $\text{La}_2\text{O}_3$ , sintering in air at 1000 °C for 2 hours to remove absorbed water,  $\text{SrCO}_3$ ,  $\text{Co}_3\text{O}_4$  (Macklin, China) and ethanol, was put into ball mill for 8 h. The dried mixture was then sintered at 1000 °C for 6 h in air to form perovskite LSC powders.

The electrochemical performance was acquired using an electrolyte-supported single cell. The electrolyte material is  $\text{La}_{0.8}\text{Sr}_{0.2}\text{Ga}_{0.83}\text{Mg}_{0.17}\text{O}_{3-\delta}$  (LSGM) since its higher ionic conductivity and well stability. The LSGM powders were prepared by the solid-state reaction as described in literature.<sup>[3]</sup> Before the synthesis,  $\text{La}_2\text{O}_3$  and  $\text{MgO}$  were sintered in air at 1000 °C for 2 hours to remove absorbed water. The obtained  $\text{La}_2\text{O}_3$  and  $\text{MgO}$  were mixed with  $\text{SrCO}_3$  and  $\text{Ga}_2\text{O}_3$  powders (Macklin, China) for further reaction. Powders were dissolved in ethanol and ball-milled for 24 hours, and LSGM electrolyte precursor was prepared after drying, then the precursor was sintering at 1450 °C for 10 hours to achieve perovskite phase powders (LSGM powders).

#### CO<sub>2</sub>-TPD test methods

Temperature-programmed desorption of CO<sub>2</sub> (CO<sub>2</sub>-TPD) was tested on tubular furnace with an on-line quadrupole mass spectrometer (HAS-301-1340, Hiden Analytical Ltd.). First, 200 mg samples were pretreated in a quartz tube at 600 °C for 1 h in N<sub>2</sub> atmosphere with a flow rate of 30 mL min<sup>-1</sup>. The heating rate was 10 °C min<sup>-1</sup>. For the CO<sub>2</sub>-TPD measurement, the pretreated samples were firstly exposed to 100% CO<sub>2</sub> for 1 h with a gas flow rate of 30 mL min<sup>-1</sup> at room-temperature. The tube was then swept with pure N<sub>2</sub> (30 mL min<sup>-1</sup>) for 1 h to remove any residual CO<sub>2</sub> gas. Thereafter, the sample was heated from 50 to 800 °C in pure N<sub>2</sub> and the desorption of CO<sub>2</sub> as a function of heating temperature was detected using the mass spectroscopy.

#### Electrolysis Cell Fabrication

The CO<sub>2</sub> electrolysis performance were evaluated using an electrolyte-supported single cell. To obtain a denser electrolyte pellet, we carried out a two-step sintering process. The LSGM electrolyte precursor was pressed into an condense pellet and pre-sintered at 1250 °C for 10 h. The obtained pellet was ground into powders and were then pressed into pellet again. After further sintering at 1450 °C for 10 h, the LSGM electrolyte was successfully prepared. The fuel electrode slurry was prepared by mixing STCF, SDC and graphite in a weight ratio of 5:5:1: with a binder composed of  $\alpha$ -terpineol and Polyvinyl Butyral, followed by ground with mortar for 3 h. The mass ratio of powders to colloid was 1.2:1. The oxygen electrode slurry composed of LSC and SDC was prepared using similar approach as the fuel electrode. The PrOx impregnation solution was prepared by dissolved  $\text{Pr}(\text{NO}_3)_3 \cdot 6\text{H}_2\text{O}$  in appropriate amount of mixture solution consist of ethanol, ethylene glycol, 2-butoxy ethanol and H<sub>2</sub>O, and the concentration of impregnates is 1 mol L<sup>-1</sup>.

The fuel electrode ink (STCF-SDC) was brushed on the one side of prepared electrolyte pellets, and co-fired at 1150 °C for 3 h. Then, the oxygen electrode slurry (LSC-SDC) was coated on the other side of LSGM, followed by sintering at 1100 °C for 2 h. Moreover, the PrOx impregnation solution was impregnated on the oxygen electrode side several times, with a total volume of 10  $\mu\text{L}$ . Finally, the complete electrolyte-supported single cell was achieved after calcined at 500 °C for 1 h, denoted as STCF-SDC/LSGM/LSC-SDC-PrOx. Ag grid was painted onto the surfaces of both sides of electrode surface as current collector layer. The electrode effective area of every cell was 0.2 cm<sup>2</sup>.

2.

### Faraday efficiency calculation

$$FE_{CO} = \frac{nFVvp_0}{RT_0I} \times 100\%$$

Where the,

$R$  and  $F$  are Molar gas constant and faraday constant, respectively.

$n$  is the number of electrons transferred in the reaction.

$v$  (Vol%) = volume concentration of CO in the exhaust gas from the cell (GC data).

$V$  (mL/min) = gas flow rate value of gas flowmeter connected to the reaction chamber of electrolytic cell at room temperature and under ambient pressure.

$I$  (A) = steady-state cell current.

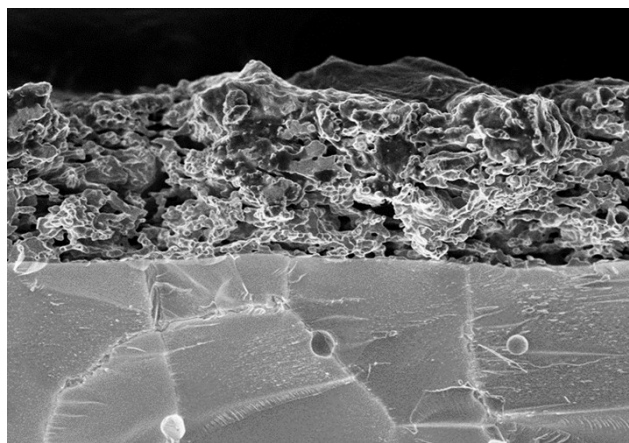

Fig. S1 SEM image of pure STCF electrode material without SDC.

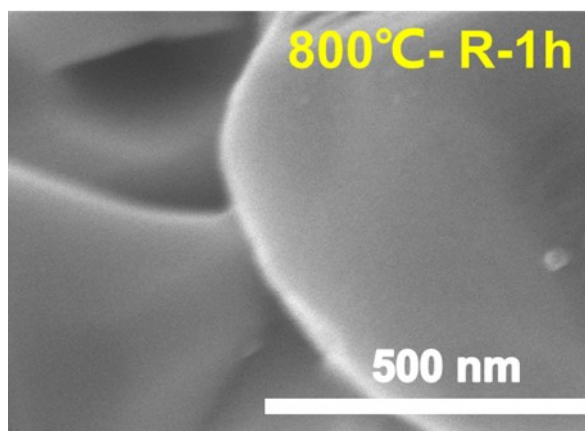

Fig. S2 SEM patterns of STCF after reduction treatment at 800 °C for 1 h.

From the point scan, five elements (Sr, Ti, Co, Fe and O) were observed in the Co-Fe-STCF material, and no other impurity elements presented (Fig. S3).

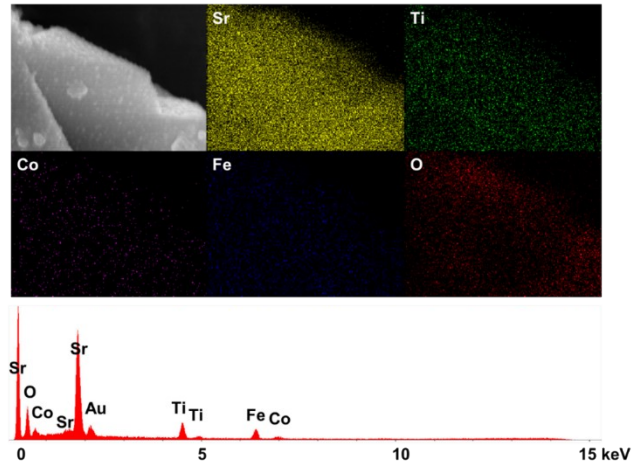

Fig. S3 SEM image and elemental maps and point scan of Co-Fe-STCF.

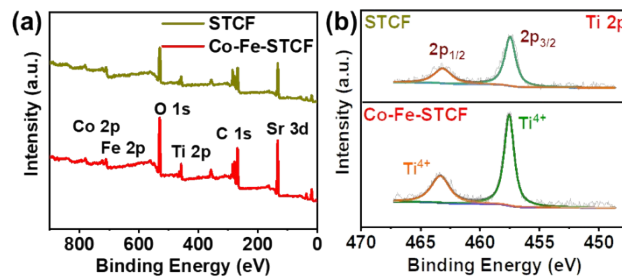

Fig. S4 XPS spectra of survey (a), and Ti 2p (b) for STCF and Co-Fe-STCF.

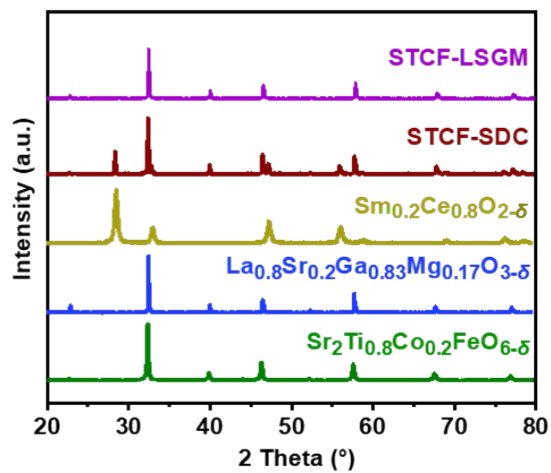

Fig. S5 A chemical compatibility results of STCF with LSGM and SDC, respectively, after calculating at 1150 °C for 10 h in air.

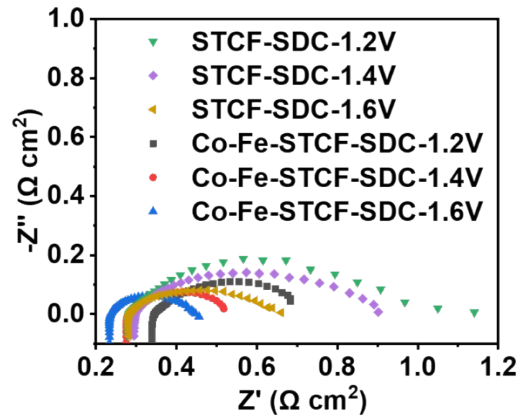

Fig. S6 EIS curves of SOEC with different fuel electrode at different potentiostatic voltages at 800 °C.

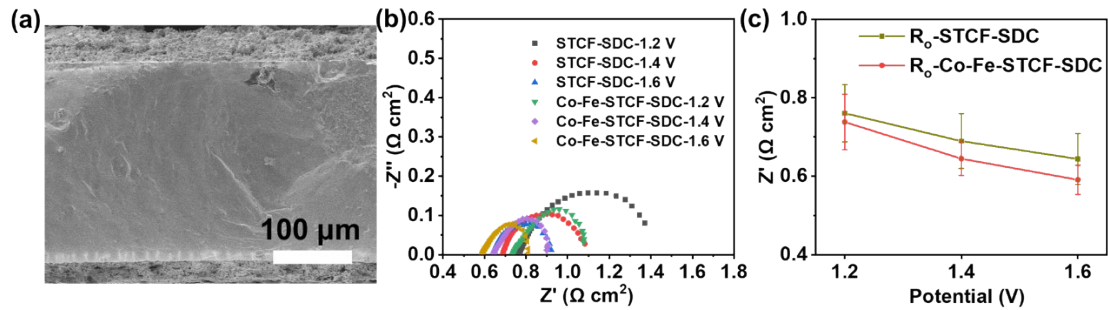

Fig. S7 (a) SEM of the cross section of another cell with STCF-SDC electrode (b) EIS curves of another sets of cells with STCF-SDC and Co-Fe-STCF-SDC electrode at different potentiostatic voltages at 800 °C and (c) The average ohmic resistance ( $R_o$ ) of different cells under the same voltage with the error bar representing the deviation of difference cells. The  $R_o$  value decreased as the applied potential got more negative. Such phenomena are likely due to the reduction of electrode material under negative potential. The reason why the Co-Fe-STCF change more apparently with applied potential is still not clear and require further investigation.

After 100 h high temperature electrolysis stability test in carbon dioxide, the microstructure of electrolyte/electrode interface has changed and is no longer dense (Fig. S8).

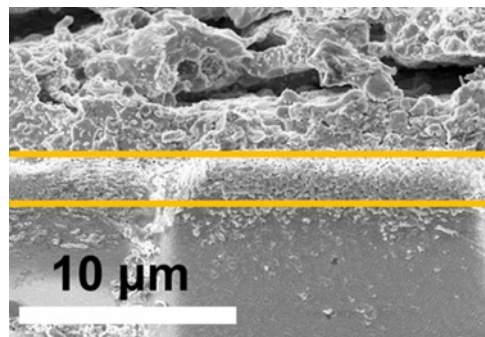

Fig. S8 SEM patterns of cell cross section after the stability test 800 °C for 100 h.

**Table S1.** XPS analysis of  $2p_{3/2}$  for Co and Fe elements.

| Elements | B.E. $2p_{3/2}$ (eV) |        |       | 0 (at.%) | 2+ (at.%) | 3+ (at.%) |
|----------|----------------------|--------|-------|----------|-----------|-----------|
|          | 0                    | 2+     | 3+    |          |           |           |
| Co       | 777.8                | 780.15 | 781.8 | 8.33     | 50.00     | 41.67     |
| Fe       | 706.6                | 710.1  | 711.9 | 4.56     | 41.50     | 53.94     |

**Table S2.** The performance of representative materials for electrolysis of pure carbon dioxide.<sup>[4-22]</sup>

| Exsolved Metal    | Oxide Matrix Composition                                                                                                                         | T (°C)     | Gas Composition                     | Potential (V) | Current Density (A cm <sup>-2</sup> ) | CO Production Rate (ml min <sup>-1</sup> cm <sup>-2</sup> ) | Ref.             |
|-------------------|--------------------------------------------------------------------------------------------------------------------------------------------------|------------|-------------------------------------|---------------|---------------------------------------|-------------------------------------------------------------|------------------|
| -                 | SrFeO <sub>3-δ</sub> -Ni                                                                                                                         | 800        | CO <sub>2</sub>                     | 1.6           | 0.75                                  | 4.8                                                         | [4]              |
| -                 | La <sub>0.75</sub> Sr <sub>0.25</sub> Cr <sub>0.5</sub> Mn <sub>0.5</sub> O <sub>3-δ</sub>                                                       | 800        | CO <sub>2</sub>                     | 1.5           | 0.09                                  | 1                                                           | [5]              |
| -                 | La <sub>0.75</sub> Sr <sub>0.25</sub> Cr <sub>0.5</sub> Mn <sub>0.5</sub> O <sub>3-δ</sub> -V <sub>2</sub> O <sub>5</sub>                        | 800        | CO <sub>2</sub>                     | 1.5           | 0.21                                  | 1                                                           | [6]              |
| -                 | La <sub>0.75</sub> Sr <sub>0.25</sub> Cr <sub>0.5</sub> Mn <sub>0.5</sub> O <sub>3-δ</sub> -NiCu                                                 | 800        | CO <sub>2</sub>                     | 1.6           | 0.782                                 | 5.32                                                        | [7]              |
| -                 | La <sub>0.6</sub> Sr <sub>0.4</sub> Fe <sub>0.9</sub> Mn <sub>0.1</sub> O <sub>3-δ</sub>                                                         | 800        | CO <sub>2</sub>                     | 1.6           | 0.68                                  | 4.319                                                       | [8]              |
| -                 | La <sub>0.6</sub> Sr <sub>0.4</sub> Fe <sub>0.8</sub> Ni <sub>0.2</sub> O <sub>3-δ</sub>                                                         | 800        | CO <sub>2</sub>                     | 1.6           | 0.629                                 | 4.08                                                        | [9]              |
| -                 | La <sub>0.5</sub> Sr <sub>0.5</sub> Fe <sub>0.95</sub> V <sub>0.05</sub> O <sub>3-δ</sub>                                                        | 800        | CO <sub>2</sub>                     | 1.6           | 0.62                                  | 4.48                                                        | [10]             |
| Ni                | (La <sub>0.2</sub> Sr <sub>0.8</sub> ) <sub>0.95</sub> Ti <sub>0.85</sub> Mn <sub>0.1</sub> Ni <sub>0.05</sub> O <sub>3-δ</sub>                  | 800        | CO <sub>2</sub>                     | 2.0           | 0.87                                  | 3.7@1.6V                                                    | [11]             |
| Ni                | (La <sub>0.75</sub> Sr <sub>0.25</sub> ) <sub>0.9</sub> (Cr <sub>0.5</sub> Mn <sub>0.5</sub> ) <sub>0.9</sub> Ni <sub>0.1</sub> O <sub>3-δ</sub> | 800        | CO <sub>2</sub>                     | 2.0           | 0.38                                  | 1.0@1.5V                                                    | [12]             |
| Ni                | Sr <sub>2</sub> Fe <sub>1.45</sub> Ni <sub>0.05</sub> Mo <sub>0.5</sub> O <sub>6-δ</sub>                                                         | 800        | CO <sub>2</sub>                     | 1.5           | 0.73                                  | 3@1.4V                                                      | [13]             |
| Ni                | (La <sub>0.3</sub> Sr <sub>0.7</sub> ) <sub>0.9</sub> Ti <sub>0.95</sub> Ni <sub>0.05</sub> O <sub>3-δ</sub>                                     | 800        | CO <sub>2</sub>                     | 2.0           | 0.3181                                | 1.3@1.6V                                                    | [14]             |
| Fe                | (Sr <sub>0.95</sub> ) <sub>0.9</sub> (Ti <sub>0.8</sub> Nb <sub>0.1</sub> Mn <sub>0.1</sub> ) <sub>0.9</sub> Fe <sub>0.1</sub> O <sub>3-δ</sub>  | 800        | CO <sub>2</sub>                     | 2.0           | 0.3142                                | 1.2@1.6V                                                    | [15]             |
| Cu                | (La <sub>0.75</sub> Sr <sub>0.25</sub> ) <sub>0.9</sub> (Cr <sub>0.5</sub> Mn <sub>0.5</sub> ) <sub>0.9</sub> Cu <sub>0.1</sub> O <sub>3-δ</sub> | 800        | CO <sub>2</sub>                     | 2.0           | 0.477                                 | 1.55@1.6V                                                   | [16]             |
| Co-Fe             | Sr <sub>2</sub> Fe <sub>1.35</sub> Mo <sub>0.45</sub> Co <sub>0.2</sub> O <sub>6-δ</sub>                                                         | 800        | CO <sub>2</sub>                     | 1.6           | 1.2                                   | 8.5                                                         | [17]             |
| Fe-Ni             | Sr <sub>1.9</sub> Fe <sub>1.5</sub> Mo <sub>0.4</sub> Ni <sub>0.1</sub> O <sub>6-δ</sub>                                                         | 800        | CO <sub>2</sub>                     | 1.5           | 2.16                                  | 1.867@1.3V                                                  | [18]             |
| FeNi <sub>3</sub> | La <sub>0.6</sub> Sr <sub>0.4</sub> Fe <sub>0.8</sub> Ni <sub>0.2</sub> O <sub>3-δ</sub>                                                         | 850        | CO <sub>2</sub>                     | 2.0           | 1.42                                  | 6@1.6V                                                      | [19]             |
| Fe-Ni             | Sr <sub>2</sub> Fe <sub>1.35</sub> Mo <sub>0.45</sub> Ni <sub>0.2</sub> O <sub>6-δ</sub>                                                         | 800        | 95% CO <sub>2</sub> /N <sub>2</sub> | 1.6           | 0.934                                 | 7.8                                                         | [20]             |
| Co-Fe             | La <sub>0.4</sub> Sr <sub>0.6</sub> Co <sub>0.2</sub> Fe <sub>0.7</sub> Mn <sub>0.1</sub> O <sub>3-δ</sub>                                       | 800        | CO <sub>2</sub>                     | 1.6           | 1.45                                  | 10.5                                                        | [21]             |
| Ni-Cu             | NbTi <sub>0.5</sub> (Ni <sub>0.75</sub> Cu <sub>0.25</sub> ) <sub>0.5</sub> O <sub>4</sub>                                                       | 800        | CO <sub>2</sub>                     | 1.6           | 0.113                                 | 0.1629@1.4V                                                 | [22]             |
| <b>Co-Fe</b>      | <b>Sr<sub>2</sub>Ti<sub>0.8</sub>Co<sub>0.2</sub>FeO<sub>6-δ</sub></b>                                                                           | <b>800</b> | <b>CO<sub>2</sub></b>               | <b>1.6</b>    | <b>1.26</b>                           | <b>8.75</b>                                                 | <b>This work</b> |

## References

- 1 B. B. Niu, C. L. Lu, W. D. Yi, S. J. Luo, X. N. Li, X. W. Zhong, X. Z. Zhao and B. M. Xu, *Appl. Catal. B: Environ.*, 2020, **270**, 118842.
- 2 T. L. Zhu, H. E. Troiani, L. V. Mogni, M. F. Han and S. A. Barnett, *Joule*, 2018, **2**, 478-496.
- 3 M. Ni, M. K. H. Leung and D. Y. C. Leung, *Int. J. Hydrogen Energy*, 2008, **33**, 2337-2354.
- 4 C. L. Zhu, S. S. Hou, L. X. Hou and K. Xie, *Int. J. Hydrogen Energy*, 2018, **43**, 17040-17047.
- 5 S. S. Xu, S. S. Li, W. T. Yao, D. H. Dong and K. Xie, *J. Power Sources*, 2013, **230**, 115-121.
- 6 X. Z. Zhang, L. T. Ye, J. P. Hu, J. Li, W. H. Jiang, C. J. Tseng and K. Xie, *Electrochim. Acta*, 2016, **212**, 32-40.
- 7 C. L. Zhu, L. X. Hou, S. S. Li, L. Z. Gan and K. Xie, *J. Power Sources*, 2017, **363**, 177-184.
- 8 X. Z. Peng, Y. F. Tian, Y. Liu, W. J. Wang, L. C. Jia, J. Pu, B. Chi and J. Li, *J. CO<sub>2</sub> Util.*, 2020, **36**, 18-24.
- 9 Y. F. Tian, H. Y. Zheng, L. L. Zhang, B. Chi, J. Pu and J. Li, *J. Electrochem. Soc.*, 2018, **165**, F17-F23.
- 10 Y. J. Zhou, Z. W. Zhou, Y. F. Song, X. M. Zhang, F. Guan, H. F. Lv, Q. X. Liu, S. Miao, G. X. Wang and X. H. Bao, *Nano Energy*, 2018, **50**, 43-51.
- 11 L. T. Ye, M. Y. Zhang, P. Huang, G. C. Guo, M. C. Hong, C. S. Li, J. T. S. Irvine and K. Xie, *Nat. Commun.*, 2017, **8**, 14785.
- 12 C. Ruan and K. Xie, *Catal. Sci. Technol.*, 2015, **5**, 1929-1940.
- 13 S. Q. Hu, L. X. Zhang, H. Y. Liu, W. P. Li, Z. W. Cao, L. L. Cai, Y. Zhu, X. F. Zhu and W. S. Yang, *J. Energy Chem.*, 2019, **36**, 87-94.
- 14 L. Z. Gan, L. T. Ye, S. W. Tao and K. Xie, *Phys. Chem. Chem. Phys.*, 2016, **18**, 3137-3143.
- 15 J. Zhang, K. Xie, Y. Zhang, L. M. Yang, G. J. Wu, Q. Q. Qin, Y. X. Li and Y. C. Wu, *RSC Adv.*, 2014, **4**, 22697-22709.
- 16 H. X. Li, G. H. Sun, K. Xie, W. T. Qi, Q. Q. Qin, H. S. Wei, S. G. Chen, Y. Wang, Y. Zhang and Y. C. Wu, *Int. J. Hydrogen Energy*, 2014, **39**, 20888-20897.
- 17 H. F. Lv, L. Lin, X. M. Zhang, Y. F. Song, H. Matsumoto, C. B. Zeng, N. Ta, W. Liu, D. F. Gao, G. X. Wang and X. H. Bao, *Adv. Mater.*, 2020, **32**, 1906193.
- 18 Y. H. Li, B. B. Hu, C. R. Xia, W. Q. Xu, J. P. Lemmon and F. L. Chen, *J. Mater. Chem. A*, 2017, **5**, 20833-20842.
- 19 Y. F. Tian, L. L. Zhang, L. C. Jia, X. Wang, J. Yang, B. Chi, J. Pu and J. Li, *J. CO<sub>2</sub> Util.*, 2019, **31**, 43-50.
- 20 H. F. Lv, L. Lin, X. M. Zhang, D. F. Gao, Y. F. Song, Y. J. Zhou, Q. X. Liu, G. X. Wang and X. H. Bao, *J. Mater. Chem. A*, 2019, **7**, 11967-11975.
- 21 H. F. Lv, T. F. Liu, X. M. Zhang, Y. F. Song, H. Matsumoto, N. Ta, C. B. Zeng, G. X. Wang and X. H. Bao, *Angew. Chem. Int. Edit.*, 2020, **59**, 15968-15973.
- 22 H. S. Wei, K. Xie, J. Zhang, Y. Zhang, Y. Wang, Y. Q. Qin, J. W. Cui, J. Yan and Y. C. Wu, *Sci. Rep.*, 2014, **4**, 5156.
